# Supplementary material
Source: PubMed Central journal article supplement (PMC7219948)
Supplement: Supplemental_material.pdf [file Supplemental_material.pdf]

## Supplementary Materials

**Supplement Table 1** Matched Sample Correlations of White Matter Integrity with PTSD

measures (n=44)

| Tract  | Hemisphere |    | PCL-C Re-experiencing | PCL-C Avoidance       | PCL-C Arousal         | PCL-C Total           |
|--------|------------|----|-----------------------|-----------------------|-----------------------|-----------------------|
|        |            |    | <i>r</i> ( <i>p</i> ) |
| UNC    | Left       | FA | .034 (.828)           | .045 (.774)           | .136 (.378)           | .077 (.621)           |
|        |            | MD | -.228 (.137)          | -.168 (.276)          | -.206 (.179)          | -.216 (.159)          |
|        | Right      | FA | .168 (.277)           | -.031 (.839)          | .288 (.058)           | .125 (.417)           |
|        |            | MD | -.243 (.111)          | -.132 (.392)          | -.212 (.166)          | -.204 (.184)          |
| CCG    | Left       | FA | -.109 (.481)          | -.133 (.388)          | .011 (.942)           | -.094 (.545)          |
|        |            | MD | .014 (.930)           | -.106 (.493)          | -.132 (.394)          | -.093 (.547)          |
|        | Right      | FA | -.019 (.901)          | .009 (.952)           | .142 (.357)           | .046 (.766)           |
|        |            | MD | -.054 (.727)          | -.077 (.621)          | -.128 (.408)          | -.096 (.536)          |
| CAB    | Left       | FA | .100 (.519)           | .170 (.269)           | .134 (.387)           | .158 (.306)           |
|        |            | MD | -.065 (.673)          | .067 (.667)           | -.003 (.983)          | .014 (.926)           |
|        | Right      | FA | .469 (.001)*          | .130 (.401)           | .111 (.474)           | .232 (.130)           |
|        |            | MD | -.373 (.013)*         | -.194 (.207)          | -.105 (.497)          | -.236 (.123)          |
| ATR    | Left       | FA | -.022 (.885)          | .089 (.564)           | .229 (.134)           | .115 (.459)           |
|        |            | MD | -.152 (.326)          | -.144 (.352)          | -.120 (.439)          | -.154 (.318)          |
|        | Right      | FA | -.063 (.685)          | -.008 (.961)          | .213 (.165)           | .049 (.752)           |
|        |            | MD | -.215 (.162)          | -.195 (.204)          | -.184 (.231)          | -.219 (.154)          |
| CST    | Left       | FA | -.037 (.814)          | .059 (.703)           | .193 (.209)           | .083 (.590)           |
|        |            | MD | -.227 (.138)          | -.040 (.798)          | .048 (.757)           | -.067 (.665)          |
|        | Right      | FA | -.067 (.667)          | .045 (.773)           | .158 (.304)           | .056 (.717)           |
|        |            | MD | -.272 (.074)          | .002 (.991)           | .049 (.753)           | -.058 (.707)          |
| ILF    | Left       | FA | -.017 (.911)          | .199 (.194)           | .203 (.185)           | .163 (.291)           |
|        |            | MD | -.144 (.352)          | -.142 (.357)          | -.208 (.175)          | -.180 (.242)          |
|        | Right      | FA | .139 (.370)           | .024 (.877)           | .230 (.133)           | .126 (.414)           |
|        |            | MD | -.119 (.443)          | -.199 (.195)          | -.213 (.165)          | -.204 (.185)          |
| SLFP   | Left       | FA | .190 (.216)           | .297 (.051)           | .390 (.009)*          | .331 (.028)*          |
|        |            | MD | -.049 (.752)          | -.040 (.797)          | .019 (.900)           | -.027 (.860)          |
|        | Right      | FA | .001 (.995)           | .129 (.405)           | .254 (.096)           | .149 (.334)           |
|        |            | MD | -.091 (.558)          | -.111 (.472)          | -.151 (.329)          | -.131 (.397)          |
| SLFT   | Left       | FA | .113 (.464)           | .207 (.177)           | .295 (.052)           | .233 (.127)           |
|        |            | MD | -.050 (.749)          | -.083 (.594)          | -.067 (.665)          | -.078 (.617)          |
|        | Right      | FA | .019 (.904)           | .147 (.340)           | .215 (.162)           | .150 (.330)           |
|        |            | MD | -.140 (.366)          | -.187 (.225)          | -.218 (.156)          | -.205 (.183)          |
| FMAJOR |            | FA | .071 (.647)           | .179 (.245)           | .081 (.602)           | .137 (.377)           |

|        |    |              |              |              |              |
|--------|----|--------------|--------------|--------------|--------------|
|        | MD | .020 (.900)  | .201 (.190)  | .165 (.286)  | .161 (.295)  |
| FMINOR | FA | -.150 (.332) | .021 (.895)  | .097 (.531)  | .001 (.995)  |
|        | MD | -.073 (.638) | -.173 (.260) | -.210 (.171) | -.177 (.250) |

\* $p < .05$ . No results survived Holm-Bonferroni correction.  $r$ , Pearson correlation coefficient;  $p$ , p-value.  
PCL-C, PTSD Checklist Civilian; FA, fractional anisotropy; MD, mean diffusivity; UNC, uncinata fasciculus; CCG, cingulum cingulate gyrus; CAB, cingulum angular bundle; ATR, anterior thalamic radiation; CST, corticospinal tract; ILF, inferior longitudinal fasciculus; SLFP, superior longitudinal fasciculus parietal; SLFT, superior longitudinal fasciculus temporal; FMAJOR, forceps major; FMINOR, forceps minor.

**Supplemental Table 2** Correlations of White Matter Integrity with PCL measures in full

sample *without gender* as factor (n=67)

| Tract  | Hemisphere |    | PCL-C Re-experiencing | PCL-C Avoidance       | PCL-C Arousal         | PCL-C Total           |
|--------|------------|----|-----------------------|-----------------------|-----------------------|-----------------------|
|        |            |    | <i>r</i> ( <i>p</i> ) |
| UNC    | Left       | FA | -.027 (.831)          | .049 (.697)           | .009 (.943)           | .016 (.900)           |
|        |            | MD | .047 (.708)           | -.017 (.889)          | .051 (.680)           | .024 (.848)           |
|        | Right      | FA | -.094 (.451)          | -.163 (.187)          | -.012 (.926)          | -.105 (.398)          |
|        |            | MD | .011 (.929)           | -.007 (.952)          | .021 (.869)           | .007 (.956)           |
| CCG    | Left       | FA | -.144 (.244)          | -.097 (.436)          | -.016 (.901)          | -.093 (.453)          |
|        |            | MD | .197 (.111)           | .062 (.619)           | .096 (.440)           | .121 (.331)           |
|        | Right      | FA | -.005 (.971)          | -.004 (.976)          | .080 (.518)           | .023 (.854)           |
|        |            | MD | .122 (.325)           | .072 (.563)           | .064 (.606)           | .091 (.464)           |
| CAB    | Left       | FA | .138 (.267)           | .178 (.149)           | .112 (.365)           | .158 (.201)           |
|        |            | MD | .053 (.673)           | .054 (.667)           | .068 (.583)           | .062 (.617)           |
|        | Right      | FA | .021 (.866)           | .008 (.948)           | -.024 (.850)          | .003 (.983)           |
|        |            | MD | -.070 (.571)          | -.113 (.363)          | -.017 (.894)          | -.077 (.534)          |
| ATR    | Left       | FA | .004 (.977)           | .084 (.499)           | .134 (.278)           | .081 (.513)           |
|        |            | MD | .153 (.218)           | .036 (.775)           | .122 (.326)           | .104 (.404)           |
|        | Right      | FA | -.112 (.366)          | -.050 (.687)          | .069 (.578)           | -.035 (.776)          |
|        |            | MD | .134 (.280)           | .018 (.885)           | .084 (.497)           | .078 (.532)           |
| CST    | Left       | FA | -.044 (.724)          | -.009 (.942)          | .077 (.538)           | .007 (.957)           |
|        |            | MD | .094 (.447)           | .134 (.279)           | .231 (.060)           | .163 (.187)           |
|        | Right      | FA | -.057 (.647)          | -.017 (.890)          | .063 (.610)           | -.005 (.967)          |
|        |            | MD | .036 (.775)           | .097 (.436)           | .178 (.151)           | .111 (.371)           |
| ILF    | Left       | FA | -.157 (.206)          | -.039 (.752)          | -.079 (.525)          | -.093 (.456)          |
|        |            | MD | .093 (.456)           | .011 (.930)           | .064 (.608)           | .055 (.659)           |
|        | Right      | FA | .058 (.641)           | .054 (.867)           | .134 (.280)           | .085 (.493)           |
|        |            | MD | .187 (.129)           | -.037 (.768)          | .069 (.581)           | .066 (.597)           |
| SLFP   | Left       | FA | -.202 (.101)          | -.037 (.763)          | -.067 (.592)          | -.102 (.410)          |
|        |            | MD | .111 (.372)           | .062 (.616)           | .107 (.391)           | .097 (.435)           |
|        | Right      | FA | -.188 (.128)          | .012 (.924)           | .047 (.708)           | -.040 (.750)          |
|        |            | MD | .161 (.194)           | .043 (.727)           | .061 (.622)           | .090 (.469)           |
| SLFT   | Left       | FA | -.187 (.129)          | -.038 (.762)          | .010 (.938)           | -.073 (.557)          |
|        |            | MD | .108 (.387)           | .042 (.738)           | .077 (.536)           | .077 (.534)           |
|        | Right      | FA | -.121 (.330)          | .059 (.637)           | .080 (.519)           | .013 (.916)           |
|        |            | MD | .074 (.553)           | -.024 (.845)          | .003 (.983)           | .014 (.912)           |
| FMAJOR |            | FA | -.022 (.862)          | .055 (.657)           | .021 (.867)           | .024 (.847)           |
|        |            | MD | .049 (.693)           | .120 (.335)           | .114 (.357)           | .105 (.398)           |
| FMINOR |            | FA | -.007 (.954)          | .010 (.938)           | .099 (.426)           | .034 (.786)           |

|    |              |              |              |              |
|----|--------------|--------------|--------------|--------------|
| MD | -.063 (.610) | -.110 (.377) | -.126 (.311) | -.109 (.381) |
|----|--------------|--------------|--------------|--------------|

---

\* $p < .05$ . No results survived Holm-Bonferroni correction.  $r$ , Pearson correlation coefficient;  $p$ , p-value.  
PCL-C, PTSD Checklist Civilian; FA, fractional anisotropy; MD, mean diffusivity; UNC, uncinata fasciculus; CCG, cingulum cingulate gyrus; CAB, cingulum angular bundle; ATR, anterior thalamic radiation; CST, corticospinal tract; ILF, inferior longitudinal fasciculus; SLFP, superior longitudinal fasciculus parietal; SLFT, superior longitudinal fasciculus temporal; FMAJOR, forceps major; FMINOR, forceps minor.

**Supplemental Table 3** Correlations of White Matter Integrity with PCL measures in full sample *without gender* as factor *without outliers* (n=60)

| Tract  | Hemisphere |    | PCL-C Re-experiencing | PCL-C Avoidance       | PCL-C Arousal         | PCL-C Total           |
|--------|------------|----|-----------------------|-----------------------|-----------------------|-----------------------|
|        |            |    | <i>r</i> ( <i>p</i> ) |
| UNC    | Left       | FA | -.039 (.766)          | .029 (.828)           | .009 (.943)           | .004 (.978)           |
|        |            | MD | -.026 (.843)          | -.108 (.410)          | -.019 (.887)          | -.063 (.633)          |
|        | Right      | FA | .052 (.693)           | -.002 (.990)          | .144 (.274)           | .065 (.622)           |
|        |            | MD | -.045 (.733)          | -.062 (.636)          | -.034 (.796)          | -.054 (.683)          |
| CCG    | Left       | FA | -.153 (.242)          | -.130 (.321)          | -.015 (.911)          | -.112 (.396)          |
|        |            | MD | .164 (.211)           | .007 (.957)           | .053 (.688)           | .073 (.580)           |
|        | Right      | FA | .049 (.708)           | .059 (.654)           | .169 (.196)           | .100 (.447)           |
|        |            | MD | .053 (.686)           | .022 (.868)           | .020 (.877)           | .034 (.799)           |
| CAB    | Left       | FA | .037 (.780)           | .077 (.561)           | .008 (.952)           | .048 (.713)           |
|        |            | MD | .047 (.723)           | .066 (.617)           | .089 (.497)           | .075 (.570)           |
|        | Right      | FA | .062 (.636)           | -.041 (.758)          | -.088 (.504)          | -.029 (.828)          |
|        |            | MD | -.144 (.273)          | -.124 (.345)          | .025 (.851)           | -.092 (.484)          |
| ATR    | Left       | FA | .124 (.344)           | .199 (.127)           | .267 (.039)           | .219 (.092)           |
|        |            | MD | .018 (.890)           | -.081 (.541)          | .009 (.943)           | -.027 (.838)          |
|        | Right      | FA | .046 (.726)           | .086 (.513)           | .252 (.052)           | .139 (.288)           |
|        |            | MD | -.032 (.808)          | -.121 (.356)          | -.054 (.681)          | -.083 (.530)          |
| CST    | Left       | FA | .009 (.946)           | .080 (.542)           | .160 (.222)           | .093 (.478)           |
|        |            | MD | .006 (.966)           | .046 (.727)           | .183 (.162)           | .085 (.519)           |
|        | Right      | FA | .054 (.681)           | .117 (.374)           | .187 (.152)           | .133 (.309)           |
|        |            | MD | -.045 (.735)          | .064 (.625)           | .155 (.236)           | .068 (.606)           |
| ILF    | Left       | FA | -.134 (.306)          | .064 (.628)           | -.005 (.969)          | -.016 (.906)          |
|        |            | MD | .035 (.790)           | -.042 (.748)          | .013 (.921)           | -.003 (.980)          |
|        | Right      | FA | .151 (.250)           | .076 (.565)           | .206 (.115)           | .152 (.247)           |
|        |            | MD | .050 (.704)           | -.095 (.473)          | -.014 (.915)          | -.031 (.813)          |
| SLFP   | Left       | FA | -.045 (.735)          | .112 (.393)           | .105 (.425)           | .072 (.585)           |
|        |            | MD | .043 (.743)           | .027 (.835)           | .080 (.543)           | .053 (.686)           |
|        | Right      | FA | -.130 (.324)          | .032 (.809)           | .100 (.446)           | .008 (.953)           |
|        |            | MD | .083 (.529)           | .012 (.925)           | .014 (.918)           | .036 (.783)           |
| SLFT   | Left       | FA | -.115 (.381)          | .028 (.833)           | .102 (.440)           | .011 (.934)           |
|        |            | MD | .096 (.465)           | .035 (.793)           | .075 (.568)           | .071 (.587)           |
|        | Right      | FA | -.097 (.460)          | .060 (.648)           | .087 (.508)           | .026 (.843)           |
|        |            | MD | .043 (.747)           | -.042 (.748)          | -.020 (.861)          | -.012 (.926)          |
| FMAJOR |            | FA | .051 (.701)           | .094 (.474)           | .056 (.671)           | .077 (.558)           |
|        |            | MD | .027 (.839)           | .180 (.169)           | .162 (.217)           | .144 (.272)           |
| FMINOR |            | FA | -.011 (.935)          | .066 (.618)           | .127 (.334)           | .069 (.598)           |

|    |              |              |              |              |
|----|--------------|--------------|--------------|--------------|
| MD | -.060 (.646) | -.170 (.195) | -.154 (.240) | -.148 (.260) |
|----|--------------|--------------|--------------|--------------|

---

\* $p < .05$ . No results survived Holm-Bonferroni correction.  $r$ , Pearson correlation coefficient;  $p$ , p-value.  
PCL-C, PTSD Checklist Civilian; FA, fractional anisotropy; MD, mean diffusivity; UNC, uncinata fasciculus; CCG, cingulum cingulate gyrus; CAB, cingulum angular bundle; ATR, anterior thalamic radiation; CST, corticospinal tract; ILF, inferior longitudinal fasciculus; SLFP, superior longitudinal fasciculus parietal; SLFT, superior longitudinal fasciculus temporal; FMAJOR, forceps major; FMINOR, forceps minor.

**Supplemental Table 4** Partial correlations of White Matter Integrity with PCL measures in full sample *with gender* as factor (n=67)

| Tract  | Hemisphere |    | PCL-C Re-experiencing | PCL-C Avoidance | PCL-C Arousal | PCL-C Total  |
|--------|------------|----|-----------------------|-----------------|---------------|--------------|
|        |            |    | <i>r (p)</i>          | <i>r (p)</i>    | <i>r (p)</i>  | <i>r (p)</i> |
| UNC    | Left       | FA | .045 (.721)           | .068 (.588)     | .032 (.797)   | .054 (.665)  |
|        |            | MD | -.044 (.724)          | -.040 (.741)    | .024 (.848)   | -.024 (.847) |
|        | Right      | FA | -.065 (.602)          | -.157 (.209)    | -.001 (.992)  | -.090 (.473) |
|        |            | MD | -.040 (.751)          | -.020 (.873)    | .005 (.970)   | -.020 (.876) |
| CCG    | Left       | FA | -.163 (.191)          | -.100 (.424)    | -.019 (.877)  | -.101 (.421) |
|        |            | MD | .161 (.196)           | .682 (.051)     | .083 (.508)   | .099 (.427)  |
|        | Right      | FA | .000 (.999)           | -.003 (.983)    | .082 (.512)   | .026 (.839)  |
|        |            | MD | .062 (.621)           | .057 (.648)     | .044 (.723)   | .059 (.639)  |
| CAB    | Left       | FA | .196 (.114)           | .193 (.120)     | .130 (.297)   | .188 (.130)  |
|        |            | MD | .004 (.975)           | .042 (.738)     | .053 (.670)   | .037 (.767)  |
|        | Right      | FA | .071 (.570)           | .020 (.873)     | -.009 (.945)  | .028 (.823)  |
|        |            | MD | -.132 (.292)          | -.129 (.302)    | -.035 (.782)  | -.109 (.384) |
| ATR    | Left       | FA | -.001 (.992)          | .083 (.508)     | .134 (.285)   | .080 (.525)  |
|        |            | MD | .124 (.320)           | .027 (.829)     | .112 (.371)   | .087 (.489)  |
|        | Right      | FA | -.095 (.450)          | -.045 (.721)    | .077 (.539)   | -.024 (.849) |
|        |            | MD | .098 (.431)           | .008 (.950)     | .072 (.565)   | .057 (.648)  |
| CST    | Left       | FA | -.033 (.796)          | -.006 (.963)    | .081 (.517)   | .014 (.912)  |
|        |            | MD | .092 (.462)           | .133 (.287)     | .230 (.063)   | .162 (.194)  |
|        | Right      | FA | -.051 (.686)          | -.015 (.905)    | .066 (.596)   | -.001 (.996) |
|        |            | MD | .045 (.719)           | .099 (.429)     | .181 (.146)   | .117 (.351)  |
| ILF    | Left       | FA | -.086 (.494)          | -.020 (.871)    | -.056 (.656)  | -.054 (.669) |
|        |            | MD | .006 (.961)           | -.012 (.925)    | .037 (.767)   | .009 (.944)  |
|        | Right      | FA | .017 (.889)           | .044 (.728)     | .122 (.328)   | .064 (.608)  |
|        |            | MD | .074 (.554)           | -.075 (.549)    | .032 (.801)   | .000 (.999)  |
| SLFP   | Left       | FA | -.171 (.169)          | -.028 (.826)    | -.054 (.664)  | -.083 (.509) |
|        |            | MD | .084 (.504)           | .055 (.662)     | .097 (.437)   | .082 (.514)  |
|        | Right      | FA | -.116 (.352)          | .034 (.787)     | .076 (.542)   | .004 (.975)  |
|        |            | MD | .112 (.370)           | .030 (.811)     | .044 (.723)   | .062 (.619)  |
| SLFT   | Left       | FA | -.111 (.375)          | -.017 (.894)    | .040 (.752)   | -.029 (.819) |
|        |            | MD | .058 (.643)           | .029 (.819)     | .061 (.627)   | .050 (.687)  |
|        | Right      | FA | -.030 (.813)          | .088 (.484)     | .118 (.347)   | .068 (.588)  |
|        |            | MD | -.007 (.955)          | -.047 (.710)    | -.025 (.845)  | -.031 (.806) |
| FMAJOR |            | FA | -.053 (.671)          | .048 (.700)     | .011 (.928)   | .009 (.945)  |
|        |            | MD | -.020 (.876)          | .106 (.399)     | .095 (.447)   | .072 (.568)  |
| FMINOR |            | FA | .045 (.717)           | .023 (.855)     | .118 (.347)   | .062 (.619)  |

|    |              |              |              |              |
|----|--------------|--------------|--------------|--------------|
| MD | -.135 (.278) | -.129 (.302) | -.150 (.228) | -.148 (.237) |
|----|--------------|--------------|--------------|--------------|

---

\* $p < .05$ . No results survived Holm-Bonferroni correction.  $r$ , Pearson correlation coefficient;  $p$ , p-value.  
PCL-C, PTSD Checklist Civilian; FA, fractional anisotropy; MD, mean diffusivity; UNC, uncinat fasciculus; CCG, cingulum cingulate gyrus; CAB, cingulum angular bundle; ATR, anterior thalamic radiation; CST, corticospinal tract; ILF, inferior longitudinal fasciculus; SLFP, superior longitudinal fasciculus parietal; SLFT, superior longitudinal fasciculus temporal; FMAJOR, forceps major; FMINOR, forceps minor.



**Supplemental Table 5** Partial correlations of White Matter Integrity with PCL measures in full sample *with gender* as factor *without outliers* (n=60)

| Tract  | Hemisphere |    | PCL-C Re-experiencing | PCL-C Avoidance       | PCL-C Arousal         | PCL-C Total           |
|--------|------------|----|-----------------------|-----------------------|-----------------------|-----------------------|
|        |            |    | <i>r</i> ( <i>p</i> ) |
| UNC    | Left       | FA | .045 (.733)           | .053 (.692)           | .035 (.792)           | .050 (.709)           |
|        |            | MD | -.129 (.330)          | -.140 (.290)          | -.049 (.715)          | -.119 (.368)          |
|        | Right      | FA | .068 (.608)           | .002 (.989)           | .148 (.263)           | .073 (.584)           |
|        |            | MD | -.099 (.456)          | -.077 (.564)          | -.049 (.710)          | -.082 (.538)          |
| CCG    | Left       | FA | -.179 (.174)          | -.136 (.305)          | -.020 (.880)          | -.123 (.354)          |
|        |            | MD | .133 (.317)           | -.003 (.981)          | .042 (.752)           | .053 (.687)           |
|        | Right      | FA | .066 (.617)           | .063 (.635)           | .174 (.187)           | .109 (.411)           |
|        |            | MD | -.001 (.994)          | .007 (.955)           | .004 (.974)           | .005 (.973)           |
| CAB    | Left       | FA | .093 (.485)           | .092 (.489)           | .023 (.860)           | .078 (.559)           |
|        |            | MD | -.008 (.951)          | .052 (.694)           | .075 (.574)           | .047 (.724)           |
|        | Right      | FA | .093 (.483)           | -.034 (.800)          | -.081 (.544)          | -.015 (.912)          |
|        |            | MD | -.189 (.152)          | -.135 (.308)          | .014 (.914)           | -.113 (.393)          |
| ATR    | Left       | FA | .123 (.354)           | .198 (.133)           | .266 (.042)           | .219 (.096)           |
|        |            | MD | -.008 (.952)          | -.088 (.507)          | .002 (.990)           | -.042 (.755)          |
|        | Right      | FA | .062 (.639)           | .090 (.497)           | .257 (.049)           | .149 (.261)           |
|        |            | MD | -.063 (.633)          | -.130 (.327)          | -.063 (.635)          | -.100 (.453)          |
| CST    | Left       | FA | .022 (.871)           | .084 (.529)           | .164 (.214)           | .101 (.446)           |
|        |            | MD | .002 (.991)           | .045 (.734)           | .182 (.167)           | .084 (.528)           |
|        | Right      | FA | .066 (.621)           | .120 (.367)           | .191 (.148)           | .140 (.291)           |
|        |            | MD | -.038 (.774)          | .067 (.615)           | .159 (.230)           | .073 (.581)           |
| ILF    | Left       | FA | -.056 (.671)          | .090 (.499)           | -.141 (.287)          | .030 (.820)           |
|        |            | MD | -.056 (.674)          | -.069 (.604)          | -.013 (.920)          | -.053 (.692)          |
|        | Right      | FA | .121 (.363)           | .067 (.616)           | .197 (.135)           | .135 (.308)           |
|        |            | MD | -.084 (.527)          | -.141 (.287)          | -.056 (.673)          | -.109 (.413)          |
| SLFP   | Left       | FA | .008 (.952)           | .129 (.332)           | .123 (.354)           | .103 (.438)           |
|        |            | MD | .023 (.864)           | .022 (.870)           | .074 (.577)           | .042 (.750)           |
|        | Right      | FA | -.050 (.709)          | .057 (.668)           | .131 (.322)           | .056 (.674)           |
|        |            | MD | .033 (.802)           | -.001 (.991)          | -.002 (.989)          | .009 (.947)           |
| SLFT   | Left       | FA | -.035 (.794)          | .053 (.692)           | .133 (.317)           | .059 (.657)           |
|        |            | MD | .050 (.708)           | .022 (.870)           | .062 (.644)           | .046 (.728)           |
|        | Right      | FA | -.009 (.946)          | .088 (.505)           | .120 (.365)           | .079 (.554)           |
|        |            | MD | -.039 (.769)          | -.066 (.619)          | -.045 (.735)          | -.057 (.667)          |
| FMAJOR |            | FA | .028 (.831)           | .088 (.506)           | .049 (.711)           | .065 (.622)           |
|        |            | MD | -.048 (.718)          | .166 (.208)           | .145 (.272)           | .110 (.405)           |
| FMINOR |            | FA | .039 (.772)           | .080 (.548)           | .143 (.279)           | .097 (.464)           |

|    |              |              |              |              |
|----|--------------|--------------|--------------|--------------|
| MD | -.133 (.317) | -.192 (.145) | -.178 (.178) | -.188 (.153) |
|----|--------------|--------------|--------------|--------------|

---

\* $p < .05$ . No results survived Holm-Bonferroni correction.  $r$ , Pearson correlation coefficient;  $p$ , p-value.  
PCL-C, PTSD Checklist Civilian; FA, fractional anisotropy; MD, mean diffusivity; UNC, uncinata fasciculus; CCG, cingulum cingulate gyrus; CAB, cingulum angular bundle; ATR, anterior thalamic radiation; CST, corticospinal tract; ILF, inferior longitudinal fasciculus; SLFP, superior longitudinal fasciculus parietal; SLFT, superior longitudinal fasciculus temporal; FMAJOR, forceps major; FMINOR, forceps minor.
